# Supplementary material for: Sharing neurophysiology data from the Allen Brain Observatory
Source: eLife. 2023 Jul 11;12:e85550. doi: 10.7554/eLife.85550 (PMC10335829; doi:10.7554/eLife.85550)
Supplement: Figure 1—source data 1. [file elife-85550-fig1-data1.xlsx]

## Sheet: Sheet1
Stages of Analysis	2P	Electrophysiology	Combined dataset size
Raw	Movies	Voltage traces	514 experiments
Processing	Motion correction	Median subtraction	1700 probes or planes
Annotation	Segmentation, event detection	Spike sorting	103,261 cells or units
Extraction	Peri-stimulus ∆F/F traces	Peri-stimulus spike trains	11.4M presentations
Quantification	Response magnitude	Firing rate	5M metrics
